# Supplementary material
Source: publisher figshare collection journal article supplement (https://asha.figshare.com/ndownloader/files/22420017)
Supplement: Supplementary file 1 [file 22420017]

Filename	Pre-Post	Subject	Gender	F1	F2	Vowel	Prepost	Unique	F2i_F2u
P067-1_Key1w.wav	post1	P067	F	388	2735	i	post	P067_post	2.237781955
P067-1_Key2w.wav	post1	P067	F	388	2735	i	post	P067_post	2.237781955
P067-1_Stew1w.wav	post1	P067	F	409	1270	u	post	P067_post	2.237781955
P067-1_Stew2w.wav	post1	P067	F	366	1270	u	post	P067_post	2.237781955
P067-4_Key1w.wav	pre1	P067	F	452	2713	i	pre	P067_pre	1.936772454
P067-4_Key2w.wav	pre1	P067	F	452	2670	i	pre	P067_pre	1.936772454
P067-4_Stew1w.wav	pre1	P067	F	409	1378	u	pre	P067_pre	1.936772454
P067-4_Stew2w.wav	pre1	P067	F	409	1378	u	pre	P067_pre	1.936772454
P071-1_Key1w.wav	post1	P071	M	258	2239	i	post	P071_post	1.824750947
P071-1_Key2w.wav	post1	P071	M	280	2132	i	post	P071_post	1.824750947
P071-1_Stew1w.wav	post1	P071	M	345	1120	u	post	P071_post	1.824750947
P071-1_Stew2w.wav	post1	P071	M	323	1077	u	post	P071_post	1.824750947
P071-4_Key1w.wav	pre1	P071	M	258	2067	i	pre	P071_pre	1.534463693
P071-4_Key2w.wav	pre1	P071	M	280	2067	i	pre	P071_pre	1.534463693
P071-4_Stew1w.wav	pre1	P071	M	301	1270	u	pre	P071_pre	1.534463693
P071-4_Stew2w.wav	pre1	P071	M	323	1486	u	pre	P071_pre	1.534463693
P210-1_Key1w.wav	post1	P210	F	452	2670	i	post	P210_post	2.142567841
P210-1_Key2w.wav	post1	P210	F	517	2541	i	post	P210_post	2.142567841
P210-1_Stew1w.wav	post1	P210	F	431	1163	u	post	P210_post	2.142567841
P210-1_Stew2w.wav	post1	P210	F	452	1335	u	post	P210_post	2.142567841
P210-4_Key1w.wav	pre1	P210	F	409	2670	i	pre	P210_pre	2.160303276
P210-4_Key2w.wav	pre1	P210	F	409	2627	i	pre	P210_pre	2.160303276
P210-4_Stew1w.wav	pre1	P210	F	388	1206	u	pre	P210_pre	2.160303276
P210-4_Stew2w.wav	pre1	P210	F	409	1314	u	pre	P210_pre	2.160303276
P264-1_Key1w.wav	post1	P264	M	366	2239	i	post	P264_post	1.650725273
P264-1_Key2w.wav	post1	P264	M	345	2239	i	post	P264_post	1.650725273
P264-1_Stew1w.wav	post1	P264	M	431	1314	u	post	P264_post	1.650725273
P264-1_Stew2w.wav	post1	P264	M	431	1378	u	post	P264_post	1.650725273
P264-2_Key1w.wav	pre1	P264	M	345	2218	i	pre	P264_pre	1.600266731
P264-2_Key2w.wav	pre1	P264	M	409	2239	i	pre	P264_pre	1.600266731
P264-2_Stew1w.wav	pre1	P264	M	431	1357	u	pre	P264_pre	1.600266731
P264-2_Stew2w.wav	pre1	P264	M	409	1378	u	pre	P264_pre	1.600266731
P265-1_Key1w.wav	post1	P265	M	301	2261	i	post	P265_post	1.939983212
P265-1_Key2w.wav	post1	P265	M	280	2347	i	post	P265_post	1.939983212
P265-1_Stew1w.wav	post1	P265	M	409	1270	u	post	P265_post	1.939983212
P265-1_Stew2w.wav	post1	P265	M	388	1206	u	post	P265_post	1.939983212
P265-4_Key1w.wav	pre1	P265	M	345	1960	i	pre	P265_pre	1.537372734
P265-4_Key2w.wav	pre1	P265	M	345	1981	i	pre	P265_pre	1.537372734
P265-4_Stew1w.wav	pre1	P265	M	431	1292	u	pre	P265_pre	1.537372734
P265-4_Stew2w.wav	pre1	P265	M	431	1400	u	pre	P265_pre	1.537372734
P340-1_Key1w.wav	post1	P340	F	388	2821	i	post	P340_post	2.442443006
P340-1_Key2w.wav	post1	P340	F	345	2993	i	post	P340_post	2.442443006
P340-1_Stew1w.wav	post1	P340	F	452	1141	u	post	P340_post	2.442443006
P340-1_Stew2w.wav	post1	P340	F	409	1249	u	post	P340_post	2.442443006
P340-4_Key1w.wav	pre1	P340	F	388	2713	i	pre	P340_pre	2.267227122
P340-4_Key2w.wav	pre1	P340	F	323	2885	i	pre	P340_pre	2.267227122
P340-4_Stew1w.wav	pre1	P340	F	409	1292	u	pre	P340_pre	2.267227122
P340-4_Stew2w.wav	pre1	P340	F	409	1292	u	pre	P340_pre	2.267227122
P346-1_Key1w.wav	post1	P346	M	345	2089	i	post	P346_post	1.756890849
P346-1_Key2w.wav	post1	P346	M	345	2153	i	post	P346_post	1.756890849
P346-1_Stew1w.wav	post1	P346	M	388	1227	u	post	P346_post	1.756890849
P346-1_Stew2w.wav	post1	P346	M	388	1249	u	post	P346_post	1.756890849
P346-4_Key1w.wav	pre1	P346	M	237	2132	i	pre	P346_pre	1.573047549
P346-4_Key2w.wav	pre1	P346	M	301	2132	i	pre	P346_pre	1.573047549
P346-4_Stew1w.wav	pre1	P346	M	345	1120	u	pre	P346_pre	1.573047549
P346-4_Stew2w.wav	pre1	P346	M	345	1507	u	pre	P346_pre	1.573047549
P442-1_Key1w.wav	post1	P442	F	345	2670	i	post	P442_post	2.315411682
P442-1_Key2w.wav	post1	P442	F	366	2756	i	post	P442_post	2.315411682
P442-1_Stew1w.wav	post1	P442	F	388	1163	u	post	P442_post	2.315411682
P442-1_Stew2w.wav	post1	P442	F	366	1098	u	post	P442_post	2.315411682
P442-4_Key1w.wav	pre1	P442	F	323	2670	i	pre	P442_pre	2.302612894
P442-4_Key2w.wav	pre1	P442	F	366	2670	i	pre	P442_pre	2.302612894
P442-4_Stew1w.wav	pre1	P442	F	388	1098	u	pre	P442_pre	2.302612894
P442-4_Stew2w.wav	pre1	P442	F	388	1357	u	pre	P442_pre	2.302612894
P520-1_Key1w.wav	post1	P520	M	388	2541	i	post	P520_post	1.986248054
P520-1_Key2w.wav	post1	P520	M	409	2476	i	post	P520_post	1.986248054
P520-1_Stew1w.wav	post1	P520	M	431	1227	u	post	P520_post	1.986248054
P520-1_Stew2w.wav	post1	P520	M	431	1227	u	post	P520_post	1.986248054
P520-4_Key1w.wav	pre1	P520	M	366	2562	i	pre	P520_pre	1.972086442
P520-4_Key2w.wav	pre1	P520	M	345	2670	i	pre	P520_pre	1.972086442
P520-4_Stew1w.wav	pre1	P520	M	388	1314	u	pre	P520_pre	1.972086442
P520-4_Stew2w.wav	pre1	P520	M	388	1184	u	pre	P520_pre	1.972086442
P737-1_Key1w.wav	post1	P737	F	388	2649	i	post	P737_post	1.44159364
P737-1_Key2w.wav	post1	P737	F	388	2670	i	post	P737_post	1.44159364
P737-1_Stew1w.wav	post1	P737	F	409	2003	u	post	P737_post	1.44159364
P737-1_Stew2w.wav	post1	P737	F	431	1701	u	post	P737_post	1.44159364
P737-2_Key1w.wav	pre4	P737	F	345	2670	i	pre	P737_pre	1.479013495
P737-2_Key2w.wav	pre4	P737	F	366	2692	i	pre	P737_pre	1.479013495
P737-2_Stew1w.wav	pre4	P737	F	409	1744	u	pre	P737_pre	1.479013495
P737-2_Stew2w.wav	pre4	P737	F	409	1744	u	pre	P737_pre	1.479013495
P752-1_Key1w.wav	post1	P752	F	301	2606	i	post	P752_post	2.042639727
P752-1_Key2w.wav	post1	P752	F	323	2584	i	post	P752_post	2.042639727
P752-1_Stew1w.wav	post1	P752	F	409	1184	u	post	P752_post	2.042639727
P752-1_Stew2w.wav	post1	P752	F	366	1120	u	post	P752_post	2.042639727
P752-4_Key1w.wav	pre1	P752	F	323	2562	i	pre	P752_pre	1.8095526
P752-4_Key2w.wav	pre1	P752	F	323	2541	i	pre	P752_pre	1.8095526
P752-4_Stew1w.wav	pre1	P752	F	409	1357	u	pre	P752_pre	1.8095526
P752-4_Stew2w.wav	pre1	P752	F	409	1335	u	pre	P752_pre	1.8095526
P760-1_Key1w.wav	post1	P760	M	258	1960	i	post	P760_post	2.164157446
P760-1_Key2w.wav	post1	P760	M	258	1960	i	post	P760_post	2.164157446
P760-1_Stew1w.wav	post1	P760	M	301	883	u	post	P760_post	2.164157446
P760-1_Stew2w.wav	post1	P760	M	301	969	u	post	P760_post	2.164157446
P760-4_Key1w.wav	pre1	P760	M	237	1938	i	pre	P760_pre	1.733021761
P760-4_Key2w.wav	pre1	P760	M	215	1960	i	pre	P760_pre	1.733021761
P760-4_Stew1w.wav	pre1	P760	M	258	1055	u	pre	P760_pre	1.733021761
P760-4_Stew2w.wav	pre1	P760	M	258	1270	u	pre	P760_pre	1.733021761
P783-1_Key1w.wav	post1	P783	F	409	2476	i	post	P783_post	1.937132942
P783-1_Key2w.wav	post1	P783	F	409	2498	i	post	P783_post	1.937132942
P783-1_Stew1w.wav	post1	P783	F	474	1335	u	post	P783_post	1.937132942
P783-1_Stew2w.wav	post1	P783	F	474	1270	u	post	P783_post	1.937132942
P783-4_Key1w.wav	pre1	P783	F	409	2455	i	pre	P783_pre	1.708285909
P783-4_Key2w.wav	pre1	P783	F	305	2412	i	pre	P783_pre	1.708285909
P783-4_Stew1w.wav	pre1	P783	F	474	1400	u	pre	P783_pre	1.708285909
P783-4_Stew2w.wav	pre1	P783	F	409	1615	u	pre	P783_pre	1.708285909
P795-1_Key1w.wav	post1	P795	M	345	2455	i	post	P795_post	1.761640929
P795-1_Key2w.wav	post1	P795	M	301	2541	i	post	P795_post	1.761640929
P795-1_Stew1w.wav	post1	P795	M	345	1270	u	post	P795_post	1.761640929
P795-1_Stew2w.wav	post1	P795	M	301	1464	u	post	P795_post	1.761640929
P795-4_Key1w.wav	pre1	P795	M	323	2433	i	pre	P795_pre	1.75905665
P795-4_Key2w.wav	pre1	P795	M	388	2347	i	pre	P795_pre	1.75905665
P795-4_Stew1w.wav	pre1	P795	M	366	1400	u	pre	P795_pre	1.75905665
P795-4_Stew2w.wav	pre1	P795	M	345	1421	u	pre	P795_pre	1.75905665
